# Supplementary material for: Treatment of real benzene dye intermediates wastewater by the Fenton method: characteristics and multi-response optimization
Source: Royal Society of Chemistry journal article supplement (doi:10.1039/c7ra09404c), 2017-12-19
Supplement: c7ra09404c1.pdf [file c7ra09404c1.pdf]

**Treatment of real benzene dye intermediates wastewater by the Fenton method:  
characteristics and multi-response optimization**

Ying Guo<sup>1</sup>, Qiang Xue<sup>1\*</sup>, Huanzhen Zhang<sup>1</sup>, Ning Wang<sup>1</sup>, Simiao Chang<sup>1</sup>, Hui Wang<sup>1</sup>, Hao  
Pang<sup>2</sup>, Honghan Chen<sup>1\*</sup>

1. *Beijing Key Laboratory of Water Resources and Environmental Engineering, School of  
Water Resources and Environment, China University of Geosciences, Beijing 100083, PR  
China*

2. *Beijing Z.D.H.K. Environmental Science & Technology Co., Ltd, Beijing 100120, China*

**\*Corresponding To**

E-mail: [xueqiang@cugb.edu.cn](mailto:xueqiang@cugb.edu.cn); Tel: 86-10-82322281

E-mail: [chenhh@cugb.edu.cn](mailto:chenhh@cugb.edu.cn); Tel: 86-10-82323345

## Supplementary Material 1

The contaminated water samples were obtained from the benzene dye production plant at the Tengger Desert, which is located in the northwest of China in the Ningxia Hui Autonomous Region. The specific component is shown in **Table S1**.

**Table S1** Specific components of raw wastewater

| Compound name                | Molecular formula | Molecular weight | Molecular structure                                                                   | CAS      |
|------------------------------|-------------------|------------------|---------------------------------------------------------------------------------------|----------|
| 4-methoxyaniline             | $C_7H_9NO$        | 123.15           | 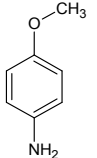   | 104-94-9 |
| 1-methoxy-3-nitrobenzene     | $C_7H_7NO_3$      | 153.14           |    | 555-03-3 |
| 4-chloroaniline              | $C_6H_6ClN$       | 127.57           |   | 106-47-8 |
| N-(4-methoxyphenyl)acetamide | $C_9H_{11}NO_2$   | 165.19           |  | 51-66-1  |
| 4-methoxy-3-nitroaniline     | $C_7H_8N_2O_3$    | 168.15           |  | 577-72-0 |
| 4-methoxy-2-nitroaniline     | $C_7H_8N_2O_3$    | 168.15           |  | 96-96-8  |
| 2-methoxy-5-nitroaniline     | $C_7H_8N_2O_3$    | 168.15           |  | 99-59-2  |

|                                          |                    |          |                                                                                      |             |
|------------------------------------------|--------------------|----------|--------------------------------------------------------------------------------------|-------------|
| 1-(3,4,5-trimethoxyphenyl)propan-2-amine | $C_{12}H_{19}NO_3$ | 225.2842 | 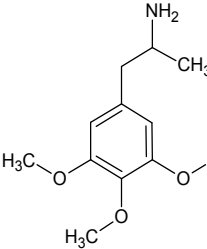   | 4838-96-4   |
| <i>N</i> -(4-methoxyphenyl)acetamide     | $C_9H_{11}NO_2$    | 165.19   |    | 51-66-1     |
| 2-Methyl-5-(methoxy)-4-nitroaniline      | $C_8H_{10}N_2O_3$  | 182.18   |    | 106579-00-4 |
| <i>N</i> -(2-methoxyphenyl)acetamide     | $C_9H_{11}NO_2$    | 165.19   |  | 93-26-5     |

---

In the actual operation process, the water samples before and after optimization of Fenton treatment were detected respectively by GC-MS. The results are shown in **Fig. S2** and **Fig. S3**.

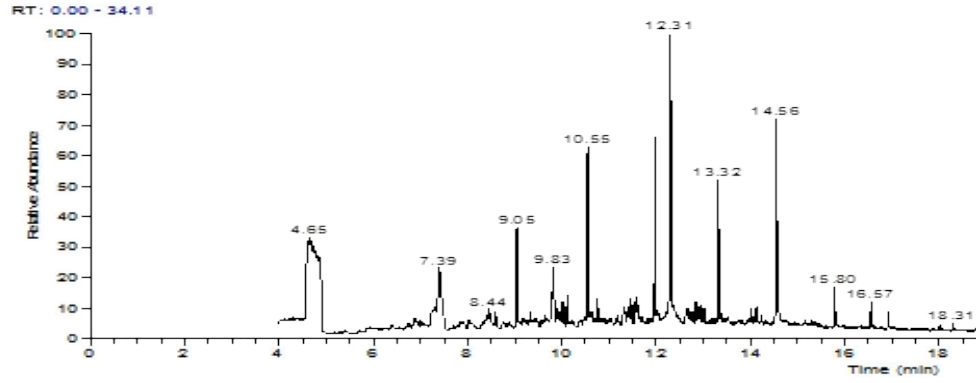

**Fig.S2** GC-MS chromatogram of original wastewater

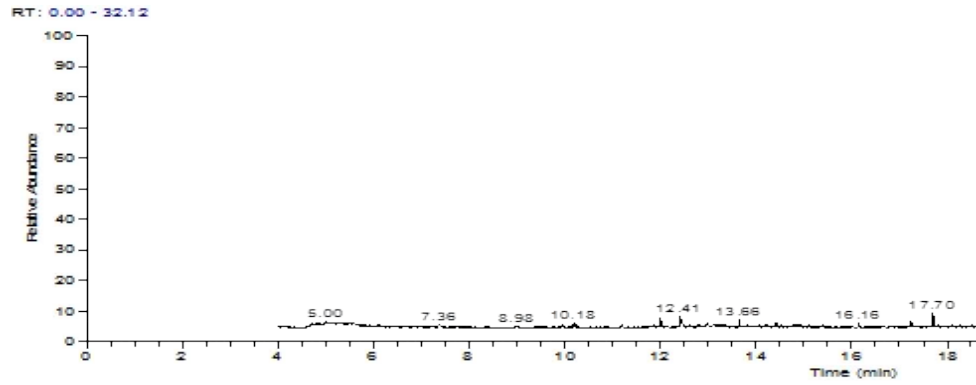

**Fig.S3** GC-MS chromatograms of water samples after optimized Fenton treatment
